# Supplementary material for: Understanding the close encounter of heme proteins with carboxylated multiwalled carbon nanotubes: a case study of contradictory stability trend for hemoglobin and myoglobin
Source: Royal Society of Chemistry journal article supplement (doi:10.1039/d1cp02167b), 2021-01-01
Supplement: d1cp02167b1.pdf [file d1cp02167b1.pdf]

## Supporting Information

### Understanding the close encounter of heme proteins with carboxylated multiwalled carbon nanotubes: a case study of contradictory stability trend for hemoglobin and myoglobin

Sumit Kumar<sup>a</sup>, Krishan Kumar<sup>a</sup>, Ritu Yadav<sup>a</sup>, Prasanna Kukutla<sup>a,b</sup>, Nagaraju Devunuri<sup>b</sup>, Nirmala Deenadayalu<sup>c</sup> and Pannuru Venkatesu<sup>a\*</sup>

<sup>a</sup>Department of Chemistry, University of Delhi, Delhi-110 007, India

<sup>b</sup>Vignan's Foundation for Science, Technology and Research (VFSTR) Deemed to be University, Vadlamudi, Guntur- 522 213, Andhra Pradesh, India

<sup>c</sup>Department of Chemistry, Durban University of Technology, Durban-4000, South Africa

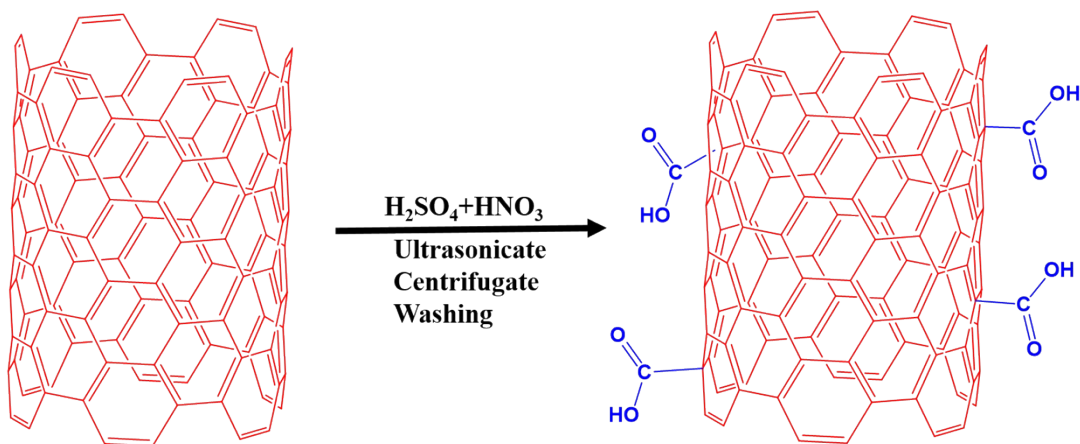

**Scheme S1:** Functionalization of crude MWCNTs.
